# Supplementary material
Source: Elsevier journal article supplement (https://www.sciencedirect.com/science/article/pii/S0001651918301729)
Supplement: mmc1 [file S0001651918301729:mmc1.doc]

**ANEXO 1 VARIABLES ANTROPOMÉTRICAS**

**MEDICIÓN DE PESO Y CÁLCULO DEL IMC**

- Medición del peso: en práctica clínica se aconseja pesar al paciente con ropa ligera y sin zapatos en una balanza con una precisión de 0.1 kg.
- Cálculo del índice masa corporal (IMC): Peso (kg)/Talla en metros al cuadrado.

| **Estado Nutricional** | **IMC** |
| --- | --- |
| **Bajo Peso** | **<18,5** |
| **Peso Normal** | **18.5–24.9** |
| **Sobrepeso** | **25-29,9** |
| Obesidad | |
| **Obesidad tipo I** | **30.0–34.9** |
| **Obesidad tipo II** | **35.0–39.9** |
| **Obesidad tipo III** | **≥40** |

Tabla 1 Clasificación del Índice de Masa Corporal (IMC)(1)

**MEDICIÓN DEL PERÍMETRO CERVICAL**

No existe consenso sobre el nivel anatómico en el que debe ser obtenido, hecho que puede afectar a su valor. Una metodología frecuentemente reportada es su medición a nivel de la membrana cricotiroidea (justo por debajo de la nuez de Adán). Debe medirse siempre con el sujeto en la misma posición, habitualmente sentado, con los hombros relajados y la cintamétrica perpendicular al eje cervical. Los resultados suelen reportarse con precisión de 0.5 cm.


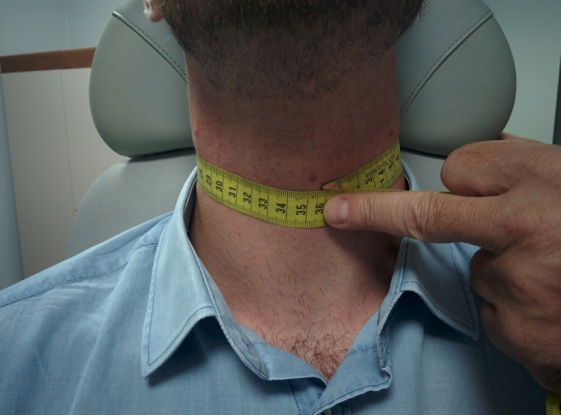

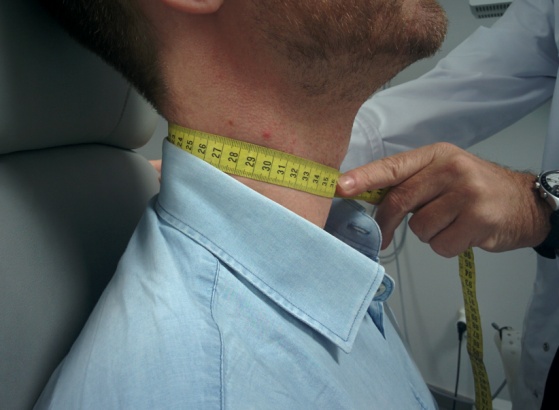


Figura 1 Medición Perímetro Cervical Frente

Figura 2 Medición Perímetro Cervical Perfil

No existen valores normativos del PC para la población general. En algunos estudios se ha considerado obesidad cervical como la presencia de un PC ≥ 35 cm en mujeres y PC ≥ 41 cm en hombres (2).

Un PC > de 41-43 cm se ha asociado a una alta probabilidad de SAHOS, un PC> 48 un muy alto riesgo de SAHOS y un PC<de 37 a muy bajo riesgo (3).

**ANEXO 2 ESCALA DE EVALUACIÓN DE LOS SÍNTOMAS DE OBSTRUCCIÓN NASAL (NOSE)**(4)

*Le agradecería nos ayude a valorar el impacto de una obstrucción nasal en su calidad de vida completando la siguiente encuesta.*

*En el último mes, ¿Con qué intensidad se convirtieron las siguientes condiciones en un problema para usted?*

Por favor rodee la respuesta correcta

|  | **No es un problema** | **Un problema muy leve** | **Un problema moderado** | **Un problema bastante serio** | **Un problema grave** |
| --- | --- | --- | --- | --- | --- |
| **Congestión nasal o sensación de nariz llena** | 0 | 1 | 2 | 3 | 4 |
| **Bloqueo u obstrucción nasal** | 0 | 1 | 2 | 3 | 4 |
| **Dificultad para respirar por la nariz** | 0 | 1 | 2 | 3 | 4 |
| **Dificultad para dormir** | 0 | 1 | 2 | 3 | 4 |
| **Incapacidad para ventilar lo suficiente por la nariz durante el ejercicio o esfuerzo físico** | 0 | 1 | 2 | 3 | 4 |

Tabla 1 Escala de evaluación de los síntomas de obstrucción nasal (NOSE) (4)

El resultado final de cada respuesta se multiplica por 5, de forma que si las 5 preguntas responden la máxima puntuación resulta un total de 100. Se considera significativo de la presencia de obstrucción nasal a partir de 30 (5)

**ANEXO 3 CLASIFICACIÓN DE FRIEDMAN DE TAMAÑO AMIGDALAR**


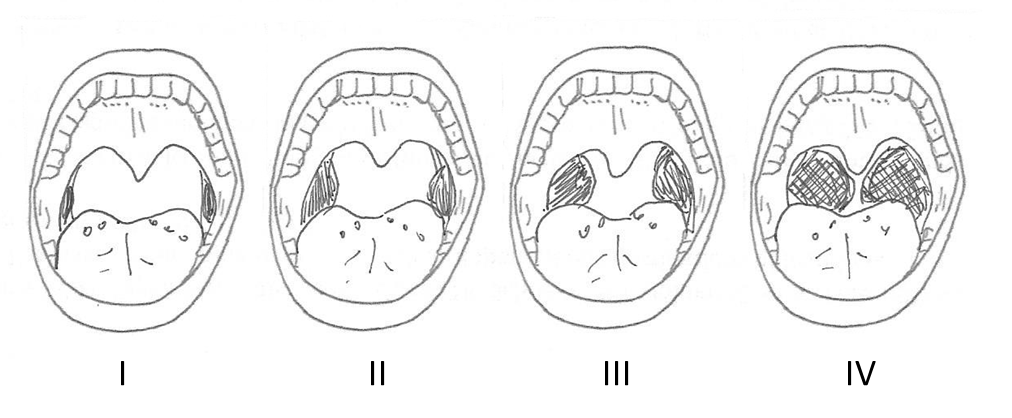


Figura 1 Clasificación de Friedman de tamaño amigdalar (11)

- Tamaño amigdalar:
  - 0: sin amígdalas
  - I: amígdalas escondidas en los pilares
  - II: amígdalas sobrepasan ligeramente los pilares
  - III: amígdalas sobrepasan ampliamente los pilares
  - IV: amígdalas llegan a la línea media

**ANEXO 4 CLASIFICACIÓN DE MALLAMPATI**

Se realiza con el paciente sentado en reposo y con la lengua fuera de la cavidad bucal.


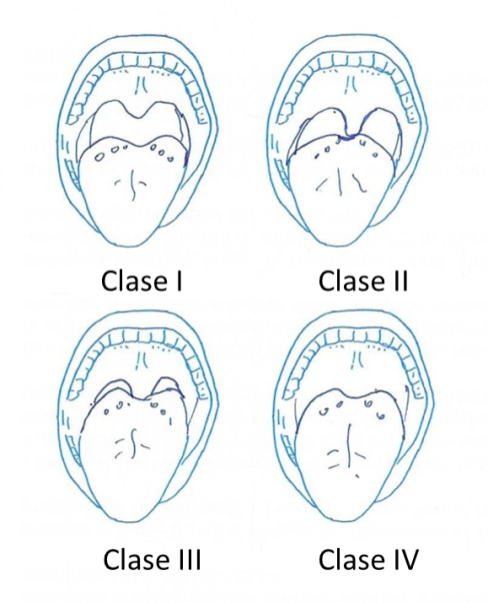


Figura 2 Clasificación de Mallampati (6)

**ANEXO 5 FRIEDMAN TONGUE POSITION O MALLAMPATI MODIFICADO**

Se realiza con el paciente sentado, en reposo, con la lengua dentro de la cavidad bucal. Valora la posición del paladar respecto a la base de la lengua.


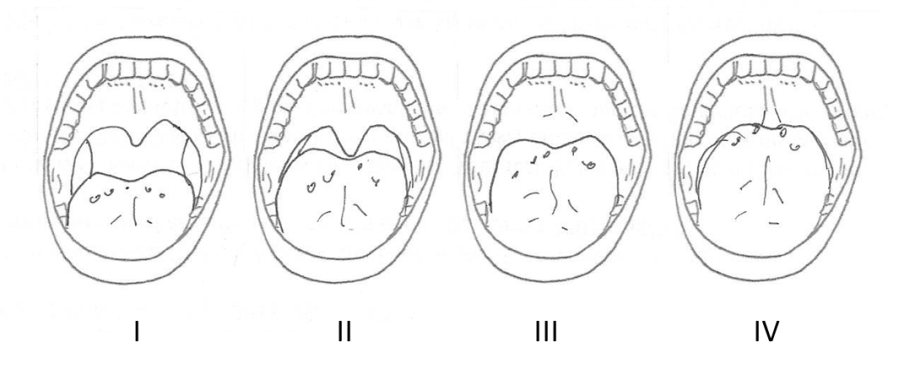


Figura 3 Friedman Tongue Position(11)

- Posición del paladar:
  - I: Visualización completa de úvula, amígdalas y pilares
  - II: Visualización de la úvula, pero no de las amígdalas
  - III: Visualización del paladar blando, pero no de la úvula.
  - IV: Visualización del paladar duro solamente.

**ANEXO 6 MANIOBRA DE MÜLLER**

Tras colocar un fibroendoscopio flexible justo por encima del paladar y de la base de la lengua se instruye al paciente a realizar una inspiración forzada con la boca cerrada y nariz tapada. Se valora el porcentaje aproximado de colapso de las paredes hacia el centro a distintos niveles.

|  | **Obstrucción**  **retropalatal** | **Obstrucción**  **retrolingual /hipofaringe** |
| --- | --- | --- |
| **Grado 1** | 25% | 25% |
| **Grado 2** | 50% | 50% |
| **Grado 3** | 75% | 75% |
| **Grado 4** | 100% | 100% |

Tabla 2 Clasificación de la Maniobra de Müller


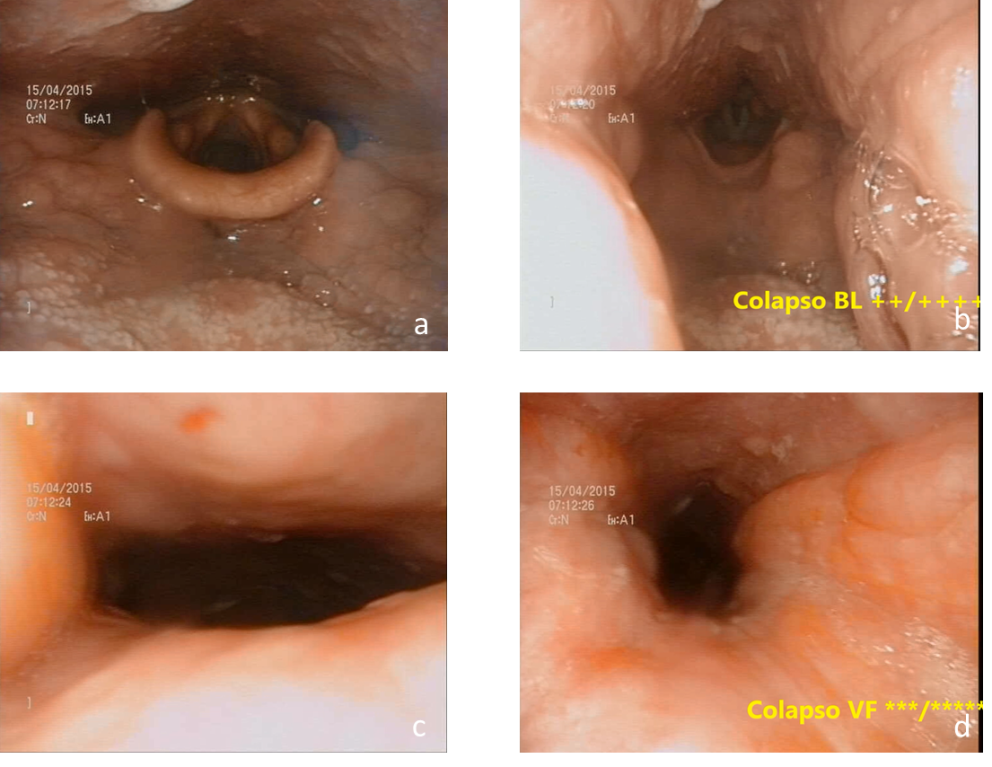


Figura 4 Clasificación de la Maniobra de Müller

Exploración de la zona retrolingual y retropalatal realizadas antes (a y c ) y durante (b y d) la realización de una maniobra de Müller. Se observa un colapso retrolingual grado 2 y retropalatal grado 3.

**ANEXO 7 EXPLORACIÓN CAVIDAD ORAL: DENTAL Y OCLUSAL**

La exploración dental desde el punto de vista oclusal consiste en valorar si las distintas posiciones dentarias y sus relaciones son las normales.

CLASSIFICACIÓN OCLUSAL DE ANGLE

La clasificación de la oclusión dental descrita por Angle en 1907, está basada en la relación anteroposterior entre los primeros molares permanentes superiores e inferiores. Esta se divide en tres grupos, oclusión de clase I, de clase II y de clase III.

OCLUSION NORMAL DE CLASE I

En la clase I existe una relación molar normal, en la cual el primer molar inferior está adelantado en una cúspide al primar molar superior. Es decir que el inferior adelanta al superior en la mitad de su diámetro.

OCLUSIÓN DENTAL DE CLASE II

En la clase II de Angle el molar inferior se encuentra situado distalmente, es decir, hacia atrás respecto de la relación molar normal.

OCLUSIÓN DENTAL DE CLASE III

En la Clase III de Angle, el molar inferior se encuentra situado mesialmente, es decir, hacia delante, respecto a la relación molar normal.


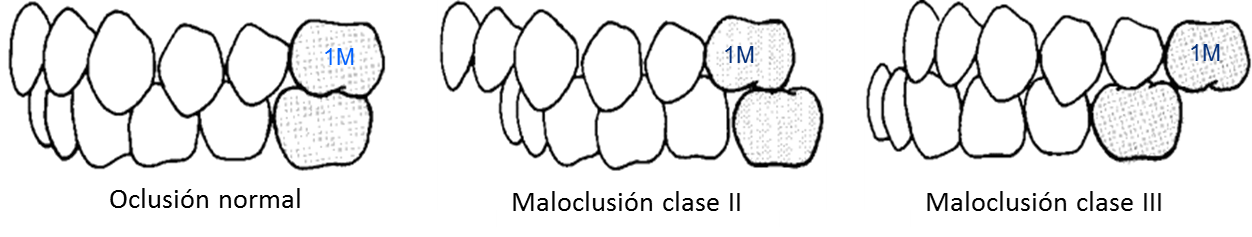


Figura 5 Clasificación oclusal de Angle(7)

**PERFIL FACIAL**


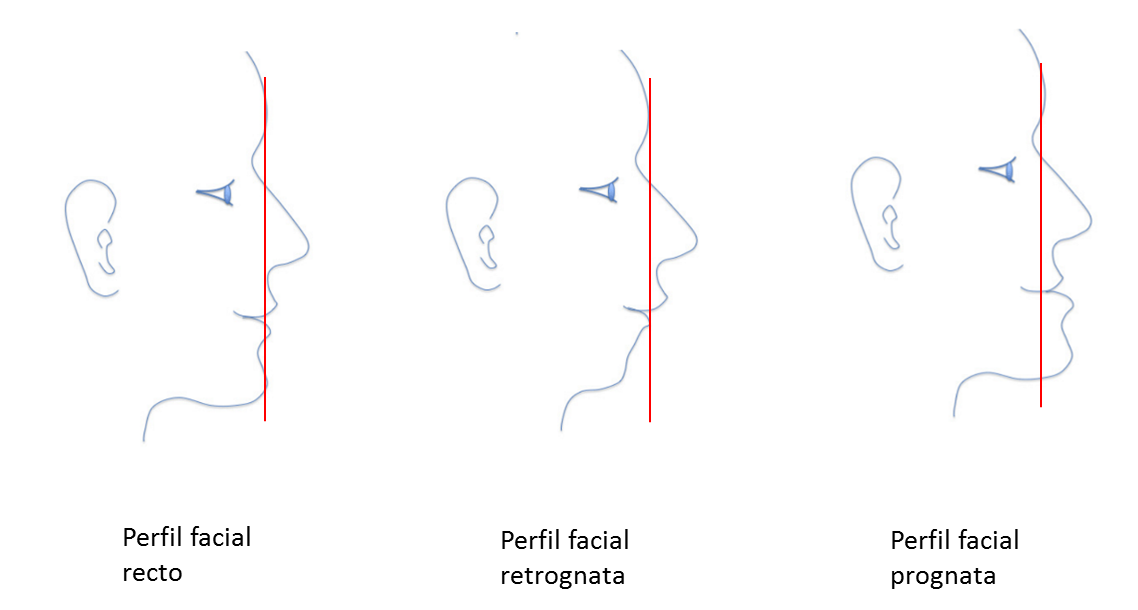


Figura 6 Perfil facial

**MORDIDA CRUZADA POSTERIOR Y MORDIDA ABIERTA**

**
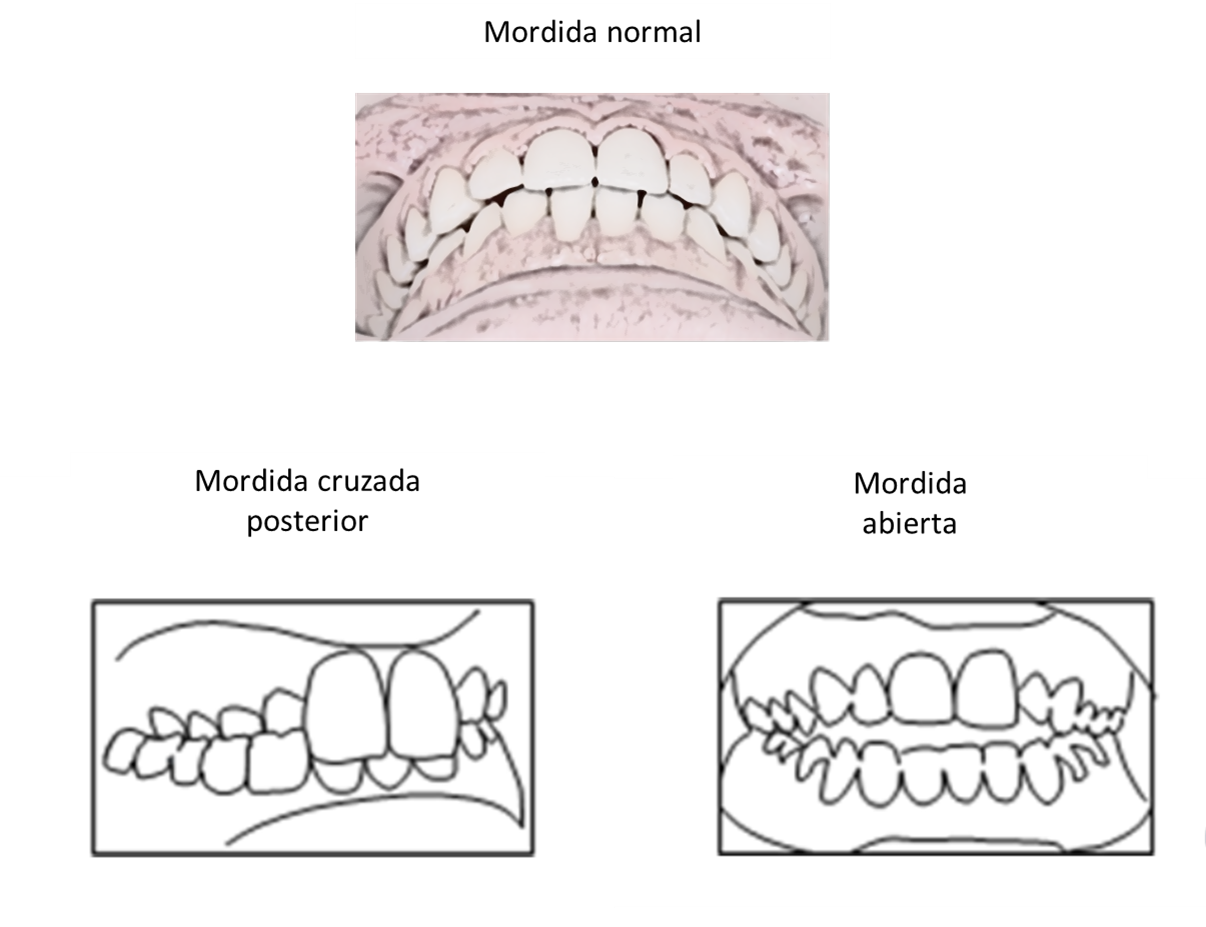
**

Figura 7 Tipo de mordida

**RESALTE (OVERJET) Y MORDIDA CRUZADA ANTERIOR**

En oclusión normal, los incisivos superiores están ligeramente por delante de los inferiores. A esto se denomina resalte (en inglés overjet) y lo normal es que entre la cara vestibular (anterior) de los incisivos inferiores y la misma cara de los superiores haya unos 2,5mm. Un resalte aumentado se suele asociar a retrognatia.

**
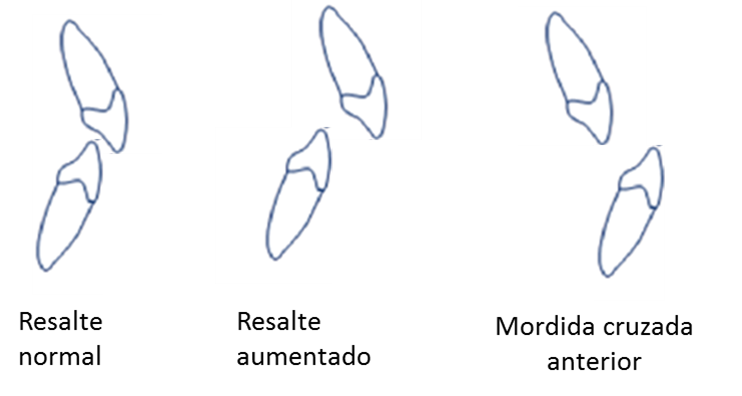
**

Figura 8 Resalte (Overjet) y mordida cruzada anterior

**ANEXO 8 CEFALOMETRÍA**

La cefalometría es el estudio de las distancias, planos y ángulos entre diversos puntos craneofaciales y cervicales, con la finalidad de conocer los valores normales, y sus variaciones.

A continuación presentamos un resumen de los puntos, líneas, planos y ángulos cefalométricos más comúnmente utilizados para el estudio de los pacientes con SAHOS, que permitan entender los artículos comentados en esta guía.

Imágenes cedidas por Vila Martin (8)

**PUNTOS CEFALOMÉTRICOS**


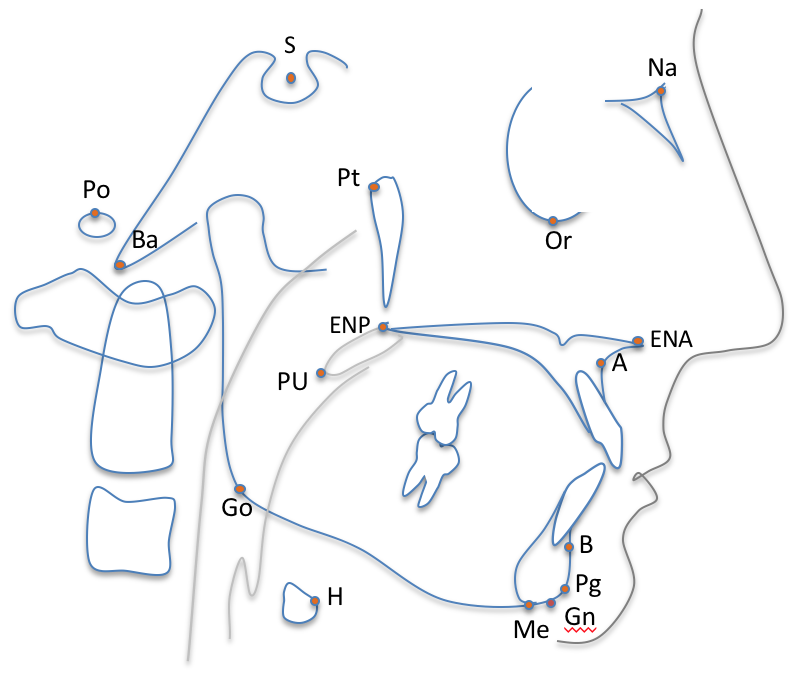


Figura 9 Puntos cefalométricos.

- Po (Porion): punto más superior del conducto auditivo externo
- Ba (Basion): punto más posteroinferior del clivus (zona descendente posterior de la base del cráneo).
- S (Sella): punto central de la silla turca.
- N (Nasion): punto más anterior de la sutura frontonasal.
- Or (Orbitario): punto más inferior del reborde orbitario.
- Pt (Pterigoideo): punto más superior y posterior del agujero redondo mayor.
- ENA (Espina Nasal Anterior): Punto más anterior del paladar duro.
- ENP (Espina Nasal Posterior): Punto más posterior del paladar duro.
- PU (Punta de la úvula): punto más posterior e inferior de la úvula.
- A (Punto A o subespinal): punto más profundo del reborde anterior maxilar.
- B (Punto B o supramental): punto más profundo de la sínfisis mentoniana.
- Pg (Pogonion): punto más anterior de la sínfisis mentoniana
- Me (Menton): punto más inferior de la sínfisis mentoniana.
- Gn: punto más anteroinferior de la sínfisis mentoniana
- Go: Punto más posteroinferior de la mandíbula
- Ar: Punto más posterior del cóndilo mandibular

**PRINCIPALES PLANOS CEFALOMÉTRICOS**


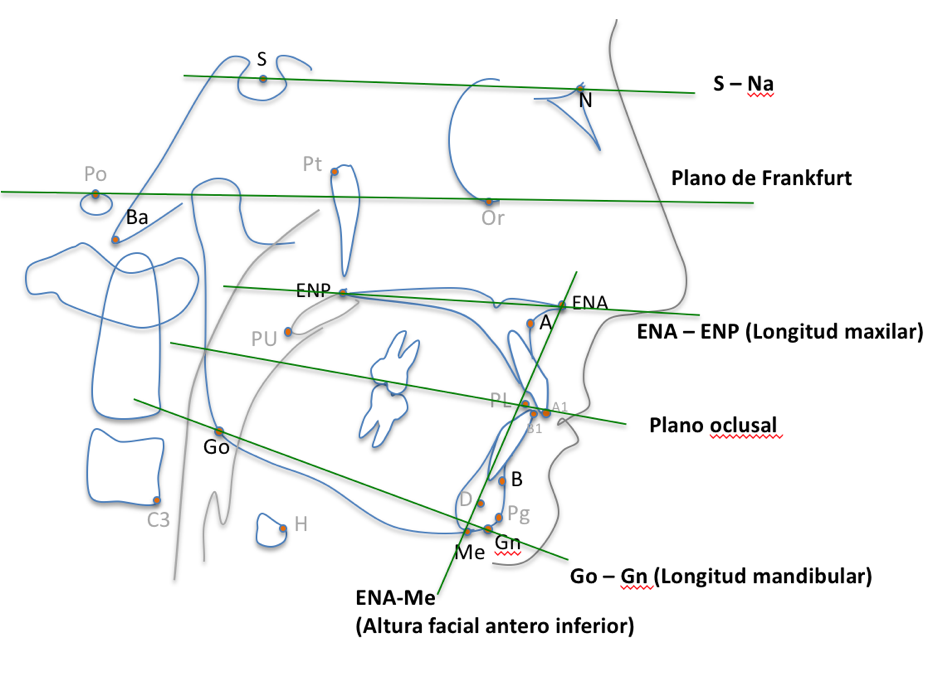


Figura 10 Principales planos cefalométricos

- Plano Sella-Nasion
- PF: Plano horizontal de Frankfurt (Porion – Orbital)
- PP: Plano Palatino o longitud maxilar (línea que pasa por los puntos ENA y ENP)
- PO: Plano oclusal (línea que pasa por los puntos de oclusión de molares y caninos)
- PM: Plano Mandibular (Gonion – Menton)
- Altura facial anteroinferior (Espina nasal anterior a Me)

**ANEXO 9 CLASIFICACIÓN EN ESTADIOS DE FRIEDMAN**

| **Estadio de Friedman** | **Posición del paladar** | **Tamaño amigdalar** | **IMC (Kg/m2)** |
| --- | --- | --- | --- |
| **Estadio I** | I-II | III-IV | <40 |
| **Estadio II** | III-IV | III-IV | <40 |
| **Estadio III** | III-IV | I-II | <40 |
| **Estadio IV** | Cualquier posición | Cualquier tamaño | >40 |

Tabla 3 Estadios de Friedman(9)

Se determinan en base a los hallazgos de la posición del paladar, el tamaño amigdalar de la clasificación de Friedman y el Índice de Masa Corporal.

**ANEXO 10 CLASIFICACIÓN DE FUJITA**

| **Tipo diagnóstico de la obstrucción** | **Paladar / orofaringe** | **Base de lengua** |
| --- | --- | --- |
| **Tipo I** | Obstrucción | Normal |
| **Tipo II** | Obstrucción | Obstrucción |
| **Tipo III** | Normal | Obstrucción |

Tabla 4 Clasificación de Fujita(10)

**BIBLIOGRAFIA**

1. Body mass index - BMI [Internet]. World Health Organization; 2017 [cited 2017 Oct 16]. Available from: http://www.euro.who.int/en/health-topics/disease-prevention/nutrition/a-healthy-lifestyle/body-mass-index-bmi

2. Alfie J, Diaz M, Cufaro P, Rodríguez P, Fábreguez G, Magni R, et al. Relación entre la circunferencia del cuello y el diagnóstico de hipertensión arterial en el Registro Nacional de Hipertensión Arterial (RENATA). Rev Argent Cardiol [Internet]. 2012 Jul 16;80(4):275–9. Available from: http://www.redalyc.org/articulo.oa?id=305326269005

3. Vilaseca I, Plaza G. ENT assessment in obstructive sleep apnea-hypopnea syndrome (OSAHS). In: Sleep Disordered Breathing Diagnsotic and Treatment. 1st ed. Hospitalet de Llobregat: Amplifon Iberica, SAU; 2017.

4. Larrosa F, Roura J, Dura MJ, Guirao M, Alberti A, Alobid I. Adaptation and validation of the Spanish version of the Nasal Obstruction Symptom Evaluation (NOSE) Scale. Rhinology [Internet]. 2015 Jun;53(2):176–80. Available from: http://www.ncbi.nlm.nih.gov/pubmed/26030042

5. Lipan MJ, Most SP. Development of a Severity Classification System for Subjective Nasal Obstruction. JAMA Facial Plast Surg [Internet]. 2013 Sep 1;15(5):358. Available from: http://archfaci.jamanetwork.com/article.aspx?doi=10.1001/jamafacial.2013.344

6. Mallampati SR, Gatt SP, Gugino LD, Desai SP, Waraksa B, Freiberger D, et al. A clinical sign to predict difficult tracheal intubation: a prospective study. Can Anaesth Soc J [Internet]. 1985 Jul [cited 2017 Aug 7];32(4):429–34. Available from: http://www.ncbi.nlm.nih.gov/pubmed/4027773

7. Angle E. Classification of Malocclusion. Dent Cosm. 1899;41(3):248–64.

8. Vila Martín J, Quesada Marín P, Sampol Rubio G, Quesada Martínez JL. Tratamiento del síndrome de apneas obstructivas del sueño leve y moderado, con un modelo de férula de avance mandibular regulable: parámetros polisomnográficos y análisis de factores predictivos de éxito [Internet] [Tesis doctoral]. Universitat Autònoma de Barcelona; 2016 [cited 2017 Aug 14]. Available from: http://ddd.uab.cat/record/166001

9. Friedman M, Ibrahim H, Bass L. Clinical staging for sleep-disordered breathing. Otolaryngol Head Neck Surg [Internet]. 2002 Jul [cited 2015 Jul 18];127(1):13–21. Available from: http://www.ncbi.nlm.nih.gov/pubmed/12161725

10. Fujita S. Pharyngeal surgery for obstructive sleep apnea síndrome. In: Fujita S, Ikematsu T, Simmons F, editors. Snoring and obstructive sleep apnea. Nueva York: Raven Press; 1987. p. 101–67.

11. Friedman M, Hamilton C, Samuelson CG, Lundgren ME, Pott T. Diagnostic value of the Friedman tongue position and Mallampati classification for obstructive sleep apnea: a meta-analysis. Otolaryngol Head Neck Surg [Internet]. 2013 Apr 15;148(4):540–7. Available from: http://www.ncbi.nlm.nih.gov/pubmed/23322629
